# Supplementary material for: The ROCK Inhibitor Ripasudil Shows an Endothelial Protective Effect in Patients With Low Corneal Endothelial Cell Density After Cataract Surgery
Source: PubMed Central journal article supplement — Transl Vis Sci Technol. 2021 Apr 16;10(4):18. doi: 10.1167/tvst.10.4.18 (PMC8083109; doi:10.1167/tvst.10.4.18), 2021-04-16
Supplement: tvst-10-4-18_s001.pdf [file tvst-10-4-18_s001.pdf]

Average: 567/mm<sup>2</sup>

Superior  
595/mm<sup>2</sup>

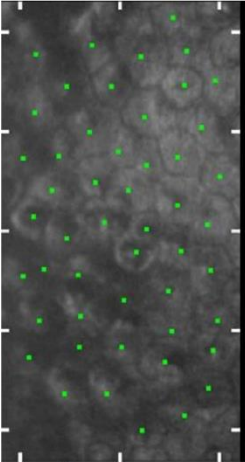

Temporal  
530/mm<sup>2</sup>

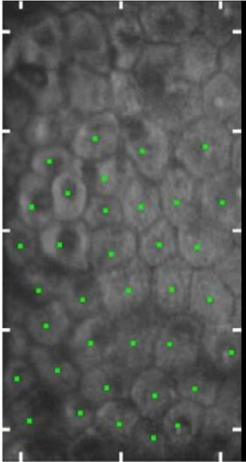

Center  
535/mm<sup>2</sup>

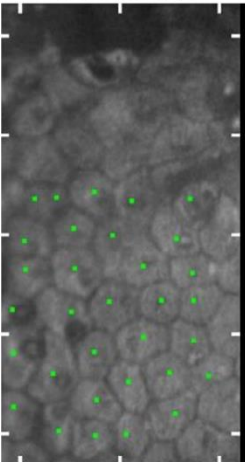

Nasal  
606/mm<sup>2</sup>

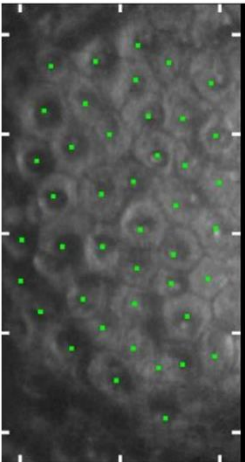

Inferior  
N/A

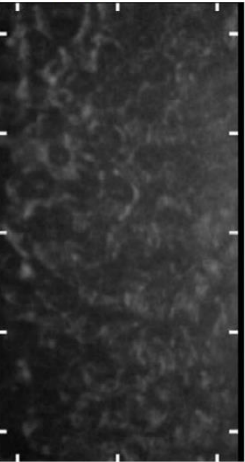

## **SUPPLEMENTARY FIGURE LEGENDS**

Supplementary Figure 1. Representative endothelial cell density measurement using non-contact type specular microscope in a FECD eye. The measured ECD values were averaged among available measurements. FECD, Fuchs endothelial dystrophy; ECD, Endothelial cell density.
